# Supplementary material
Source: PubMed Central journal article supplement (PMC7541598)
Supplement: NIHMS1592322-supplement-3.pdf [file NIHMS1592322-supplement-3.pdf]

|                                                             | <b>MS (n=10)</b> | <b>HV (n=2)</b> |
|-------------------------------------------------------------|------------------|-----------------|
| <b>Age (years), mean ± standard deviation</b>               | 48 ± 6           | 46 ± 11         |
| <b>Sex, female/male</b>                                     | 7/3              | 1/1             |
| <b>Years since symptom onset, mean ± standard deviation</b> | 9 ± 5            |                 |
| <b>Clinical subtype</b>                                     |                  |                 |
| <b>Relapsing Remitting</b>                                  | 8                |                 |
| <b>Secondary Progressive</b>                                | 1                |                 |
| <b>Primary Progressive</b>                                  | 1                |                 |
| <b>Expanded Disability Status Score, median (range)</b>     | 2 (0-6.5)        |                 |

Table S1. Cohort characteristics.
